# Supplementary material
Source: publisher figshare collection journal article supplement (https://acs.figshare.com/ndownloader/files/4949083)
Supplement: Supplementary file 1 [file 4949083]

## Supporting Information

### Evidence for Spin Glass Ordering Near the Weak to Strong Localization Transition in Hydrogenated Graphene

Bernard R. Matis<sup>1,\*</sup>, Brian H. Houston<sup>1</sup>, and Jeffrey W. Baldwin<sup>1</sup>

<sup>1</sup> Naval Research Laboratory, Code 7130, Washington, DC 20375, United States

\*Correspondence to: [bernard.matis@nrl.navy.mil](mailto:bernard.matis@nrl.navy.mil)

#### Sample Raman spectra and estimate of defect free domain size $L_a$ :

Raman spectroscopy was used to confirm the presence of single layer graphene by fitting the shape of the 2D peak ( $2679\text{ cm}^{-1}$ , second-order D mode), and to quantify the degree of hydrogenation using the  $I_D/I_G$  ratio, which is the relative intensity of the D mode ( $1345\text{ cm}^{-1}$ , appearing due to symmetry breaking at defect sites) with respect to the G mode ( $1588\text{ cm}^{-1}$ ,  $E_{2g}$  phonon mode). All Raman spectra were taken under ambient conditions using a 514 nm laser excitation.

Figure S1 shows two sample Raman spectra of a graphene device before and after hydrogenation; this particular data set corresponds to the hydrogenated device with  $I_D/I_G \sim 1.6$  as described in the main text. A rough estimate of the defect free domain size  $L_a$  before and after hydrogenation is found from  $L_a^2(\text{nm}^2) = (1.8 \times 10^{-9}) \lambda^4 (I_G/I_D)$ , where  $\lambda = 514\text{ nm}$  is the excitation

wavelength.<sup>SR1</sup> For this particular data set shown in Figure S1 after hydrogenation and with  $I_D/I_G \sim 1.6$  we find  $L_a \sim 8.9$  nm, which is comparable to the value for the elastic mean free path  $L_e \sim 7.46$  nm determined from the transport data.

### **Estimates of $\sigma_S$ , $n$ , and $\sigma_D$ :**

The short-range conductivity  $\sigma_S$ , the charge carrier density  $n$  at the Dirac point (DP), and the Drude conductivity  $\sigma_D$  are estimated from the measured transport of the graphene and hydrogenated graphene at zero magnetic field  $B$ . For example, Figure S2 shows the measured conductivity  $\sigma$  versus  $n$  at  $B = 0$  T for one of our hydrogenated devices. Values for  $\sigma$  were obtained from  $\sigma = L/RW$  where  $L$  and  $W$  are the sample length and width, respectively, and  $R$  is the sample resistance obtained by sourcing a current between electrodes 1 and 2,  $I_{12}$ , as labeled in Figure 1a of the main text and by measuring the resultant voltage drop along the current path using electrodes 3 and 4,  $V_{34}$ . Applying a back gate voltage  $V_g$  to the doped Si substrate allows us to vary  $n$ . We determine  $n$  from  $n = 1/eR_H$  where  $e$  is the fundamental unit of electric charge and  $R_H$  is the Hall coefficient, defined as  $R_H = R_{xy}/B$ .  $R_{xy}$  was found from  $R_{xy} = V_{78}/I_{12}$  (Figure 1a of the main text) with  $B = 2.6$  T applied perpendicular to the plane of the graphene.

The data in Figure S2 for the hydrogenated graphene is well fitted by a diffusive transport model given by

$$\sigma(n) = \left( \frac{1}{ne\mu_L} + \rho_s + \rho_{ph} \right)^{-1} \quad (S1)$$

where  $\mu_L$  is the  $n$ -independent mobility due to long-range, uncorrelated charged impurity scattering, and  $\rho_s$  and  $\rho_{ph}$  are the contributions to the resistivity due to short-range scattering and

acoustic phonon scattering, respectively. Here,  $\mu_L$  and  $\rho_s$  are the free fitting parameters and  $\rho_{ph} = (0.1 \text{ } \Omega/\text{K}) \times T$ .<sup>SR2</sup> From the data fitting with Equation S1 we can determine  $\sigma_S$  by  $\sigma_S = 1/\rho_S$ .

We estimate  $n$  at the DP using the full width at half maximum  $\Delta W_{DP}$  of the  $\rho = 1/\sigma$  vs.  $n$  peak. This results in an upper bound for the carrier density fluctuations  $\delta n_{max}$  due to charge carrier puddle formation near the DP. For example, for the data shown in Figure S2 we find  $\delta n_{max} \sim 6.15 \times 10^{15} \text{ m}^{-2}$ , which is comparable to that observed for exfoliated graphene on  $\text{SiO}_2$ .<sup>SR3</sup> -<sup>SR5</sup> This value obtained here for  $\delta n_{max}$  indicates a scattering contribution from charged impurities at low  $n$ . Values for  $\delta n_{max}$  provide an estimate for  $n$  at the DP where contributions from charged impurity scattering dominates the transport.<sup>SR6</sup>

Lastly, using Matthiessen's Rule we estimate  $\sigma_D$  from  $\sigma^{-1} = \sigma_S^{-1} + \sigma_D^{-1}$  where  $\sigma$  is the overall conductivity measured through transport measurements.

### Interpreting the various length scales:

As an example, for the hydrogenated device with  $I_D/I_G \sim 1.6$ :

The elastic mean free path  $L_e = \sigma_D \hbar / [2e^2 (\pi n)^{1/2}]$  is found to be  $L_e \sim 7.46 \text{ nm}$ , which is comparable to the defect free domain size  $L_a \sim 8.9 \text{ nm}$  (see section above titled: **Sample Raman spectra and estimate of defect free domain size  $L_a$** ). The magnetic length  $L_B$  is determined by  $L_B = (\hbar / e B)^{1/2} = 26 \text{ nm} / \sqrt{B}$  and ranges from 58.1 nm (at 0.2 T) to 16.1 nm at (2.6 T). The curved arc trajectory length  $r_C$  is determined by  $r_C = m^* \mu / e B$ , where  $m^*$  is the effective mass of the charge carriers in graphene and  $\mu$  the carrier mobility found from the transport, which

ranges from 87 fm (at 0.2 T) to 7 fm at (2.6 T). The thermal length  $L_T$  is determined by

$L_T = \left( \hbar D / k_B T \right)^{1/2}$ , where  $D$  is the diffusion constant (see the main text) and  $k_B$  is Boltzmann's

constant, and is  $L_T \sim 116$  nm and is independent of  $B$ . The cyclotron radius  $L_C$  is determined by

$L_C = \hbar k_F / e B = \hbar (\pi n)^{1/2} / e B$ , where  $k_F$  is the Fermi wave vector, which ranges from 457

nm (at 0.2 T) to 35.2 nm at (2.6 T). Additionally, the Fermi wavelength is  $\lambda_F = 2\pi / k_F =$

$2\pi / (\pi n)^{1/2} \sim 45$  nm. That  $\lambda_F$  is larger than  $L_a$  (the characteristic size of the system) suggests

that quantum effects are important. However, if the transition to a linear MR for  $B \sim B_S$  as

described in the main text was governed by any of the calculated length scales then one may

expect a transition of such a length scale from larger than to smaller than  $L_a$  when  $B$  is  $\sim B_S$ , yet

such a transition is not observed to occur. Thus, we conclude that the transition to a negative

linear MR at  $B \sim B_S$  is not governed by any of these length scales.

### **Resistivity $\rho$ versus $V_g$ for varying $B$ :**

Plotted in Figure S3 is a sample trace of the resistivity  $\rho$  versus back gate voltage  $V_g$  taken at  $T = 4.2$  K for  $B = 0$  T (for both graphene and hydrogenated graphene) and  $B = 2.6$  T (for the hydrogenated graphene). Figure S3 clearly shows that the largest change in the magnetoresistance occurs at the DP where the spin glass properties have been observed. As  $V_g$  is shifted to values above or below the DP, corresponding to higher electron and hole concentrations, respectively, the change in the magnetoresistance quickly tends to zero.

## References:

- SR1. Cancado, L. G.; Jorio, A.; Martins Ferreira, E. H.; Stavale, F.; Achete, C. A.; Capaz, R. B.; Moutinho, M. V. O.; Lombardo, A.; Kulmala, T. S.; Ferrari, A. C. Quantifying Defects in Graphene *via* Raman Spectroscopy at Different Excitation Energies. *Nano Lett.* **2011**, 11 (8), 3190-3196.
- SR2. Chen, J.-H.; Jang, C.; Xiao, S.; Ishigami, M.; Fuhrer, M. S. Intrinsic and Extrinsic Performance Limits of Graphene Devices on SiO<sub>2</sub>. *Nature Nanotech.* **2008**, 3, 206-209.
- SR3. Martin, J.; Akerman, N.; Ulbricht, G.; Lohmann, T.; Smet, J. H.; Von Klitzing, K.; Yacoby, A. Observation of Electron-Hole Puddles in Graphene Using a Scanning Single-Electron Transistor. *Nature Phys.* **2008**, 4, 144-148.
- SR4. Jalilian, R.; Jauregui, L. A.; Lopez, G.; Tian, J.; Roecker, C.; Yazdanpanah, M. M.; Cohn, R. W.; Javanovic, I.; Chen, Y. P. Scanning Gate Microscopy on Graphene: Charge Inhomogeneity and Extrinsic Doping. *Nanotechnology* **2011**, 22, 295705.
- SR5. Yan, J.; Henriksen, E. A.; Kim, P.; Pinczuk, A. Observation of Anomalous Phonon Softening in Bilayer Graphene. *Phys. Rev. Lett.* **2008**, 101, 136804.
- SR6. Matis, B. R.; Houston, B. H.; Baldwin, J. W. Influence of Spatial Inhomogeneity on Electronic and Magnetotransport in Graphene. *Phys. Rev. B* **2015**, 91, 205406.

### Supporting Information figures:

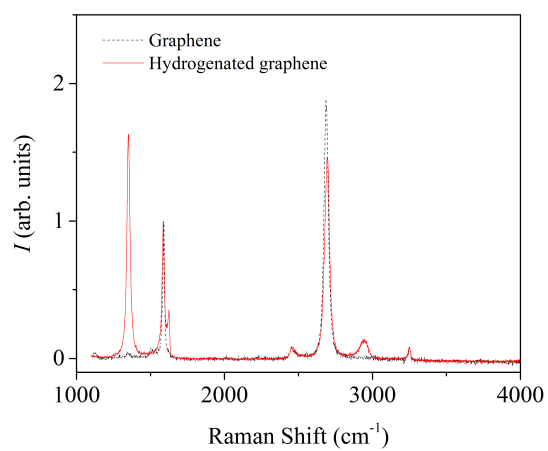

Figure S1. Sample Raman spectra of the initial graphene (dashed trace) and hydrogenated graphene (solid trace). The spectra have been normalized to the *G* mode intensity.

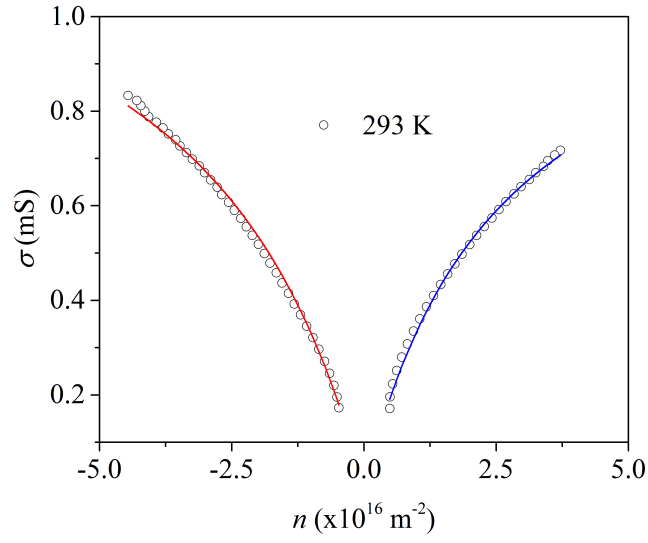

Figure S2. Sample trace of the conductivity  $\sigma$  *versus* charge carrier density  $n$  at magnetic field  $B = 0$  T for hydrogenated graphene. The open circles are the experimental data and the solid lines are fits to Equation S1.

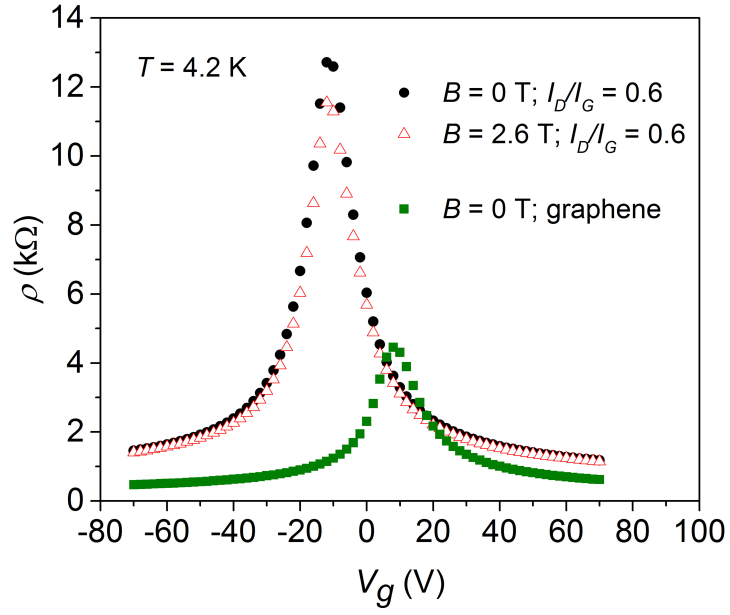

Figure S3. Sample traces of the resistivity  $\rho$  versus back gate voltage  $V_g$  for graphene (green trace) and hydrogenated graphene (black and red traces) at varying magnetic field  $B$  and for  $T = 4.2$  K.



Table SI. Device characteristics for increasing  $I_D/I_G$ . The Ioffe-Regel parameter is given by  $k L_e$ .

| $I_D/I_G$ | $\rho(B=0)$ ( $\Omega$ ) | $\rho(B=0)$<br>( $h/2e^2$ ) | Measured<br>spin glass | Localization<br>regime | $k L_e$ |
|-----------|--------------------------|-----------------------------|------------------------|------------------------|---------|
| 0.6       | 11,470                   | 0.89                        |                        | WL                     | 7.07    |
| 0.7       | 15,968                   | 1.23                        | ✓                      |                        | 5.08    |
| 0.8       | 17,072                   | 1.32                        | ✓                      |                        | 4.75    |
| 1.6       | 13,594                   | 1.05                        | ✓                      |                        | 5.97    |
| 2.0       | 71,597                   | 5.55                        |                        | SL                     | 1.13    |
